# Supplementary material for: P114 The Potential Impacts of Childhood Experiences of Forced Eating on Vegetable Consumption Among Korean Young Adults
Source: Elsevier journal article supplement (doi:10.1016/j.jneb.2020.04.161), 2020-07-01
Supplement: mmc21 [file mmc21.pdf]

# The potential impacts of childhood experiences of forced eating on vegetable consumption among Korean young adults

So-Young Kim<sup>1</sup>, Eun Ju Lee<sup>2</sup>

<sup>1</sup>Department of Food Science and Nutrition, Soonchunhyang University, South Korea

<sup>2</sup>Daegok Elementary School, South Korea

## Background and Purpose

- Previous researches have highlighted that forced eating might lead to a long-lasting food rejection. Vegetable is the most common subject of forced eating due to its sensory bitterness causing an instinct-guided rejection.
- Currently, unbalanced diet with insufficient vegetable consumption is being recognized, particularly among young adults.
- The Korean Healthy Eating Index for adults, which is based on the Korea National Health and Nutrition Examination Survey, has reported that when taken by age group, those in their 20s had the lowest average scores and that this was attributed to lower intakes of vegetables, fruits, and grains when compared to those of other age groups
- Individuals exhibit picky eating behaviors for some food items depending on their preference. However, since picky eating can become a lifelong dietary habit, it is necessary to identify the specific causes of picky eating and modify them with timely intervention during younger periods of developmental growth.
- This problem appears to be associated with multi-dimensional factors but might also be related to childhood experiences of forced eating.
- Only a few studies have investigated the effects of forced eating in childhood on future diet habits. Therefore, this study aimed to explore the potential impacts of childhood experiences of forced eating on vegetable consumption among Korean young adults.

## Methodology

- An on-line survey was conducted to a total of 1277 Korean young adults in their 20s from February 18<sup>th</sup> to 24<sup>th</sup>, 2020.
- The questionnaire consisted of general information, childhood experience of forced eating (when, where, what, and by whom), the effect of childhood experiences of forced eating on current eating habits, perceived daily intake of vegetable, and vegetable acceptance and preference. Each survey item was selected and modified according to the purpose of this study through literature review on food attitudes and behaviors.
- The effect of childhood experiences of forced eating on current eating habits, perceived daily intake of vegetable, and vegetable acceptance and preference were measured using a 5-point Likert scale anchored at 1 (strongly disagree) and 5 (strongly agree).
- Descriptive statistics were calculated and significant differences in vegetable consumption (i.e., perceived daily intake of vegetables, and vegetable acceptance and preference) were analyzed using a t-test according to childhood experiences of forced eating.
- All analyses were performed using SPSS ver. 23.0 and the level of significance was set at  $p < 0.05$ .

## Results and Conclusions

- Out of 1277 participants, 55.4 percent were female. Most of them were unmarried (95.1%), while the proportion of single-person households (49.1%) was almost the same as that of living with families/others (50.9%). Majorities were office workers (44.2%) and college students (24.3%). **Around 36.1 percent of the respondents were found to have experienced forced eating in childhood** (Table 1).
- Forced eating occurred mostly when they were elementary school students (57.2%); 44.2 % in lower and 13.0% in upper grades, and preschool children (21.2%)** (Table 2).
- Forced eating happened mostly frequently at home (51.0%), followed by schools (26.5%). Respondents mostly identified parents (50.1%) and school teachers (26.0%) as authority figures involved in forced eating** (Table 2).
- Approximately 41.0 percent of those who have experienced forced eating in childhood were still not able to eat the target foods of forced eating, and 44.2 percent acknowledged its negative impacts on their current dietary habits** (Table 2).
- Among the target foods of forced eating, **vegetables were most prevalent** (57.9%) (Figure 1).
- Perceived daily intake of vegetable, and vegetable acceptance and preference tended to be significantly lower when they had childhood experiences of forced eating** (Table 3).
- This study implies that childhood experiences of forced eating could make negative impacts on future dietary habits related to vegetable consumption.** Despite some limitations, it may shed light on the importance and necessity of preventing forced eating in childhood and intervening its negative impacts on future dietary habits.

Table 1. General characteristics of participants (n=1277)

| Classification                         | n                 | %    |       |
|----------------------------------------|-------------------|------|-------|
| Gender                                 | Male              | 570  | 44.6  |
|                                        | Female            | 707  | 55.4  |
| Marital status                         | Unmarried         | 1214 | 95.1  |
|                                        | Married           | 63   | 4.9   |
| Single-person household                | Yes               | 627  | 49.1  |
|                                        | No                | 650  | 50.9  |
| Occupation                             | Self-employed     | 15   | 1.2   |
|                                        | Professionals     | 106  | 8.3   |
|                                        | Office workers    | 565  | 44.2  |
|                                        | College students  | 310  | 24.3  |
|                                        | Graduate students | 70   | 5.5   |
|                                        | Unemployed        | 169  | 13.2  |
| Childhood experiences of forced eating | Yes               | 461  | 36.1  |
|                                        | No                | 816  | 63.9  |
|                                        | Total             | 1277 | 100.0 |

Table 2. Childhood experience of forced eating (n=461)

| Classification                                                                                                | n                                | %     |      |
|---------------------------------------------------------------------------------------------------------------|----------------------------------|-------|------|
| When                                                                                                          | Lower grade of elementary school | 204   | 44.2 |
|                                                                                                               | Upper grade of elementary school | 60    | 13.0 |
|                                                                                                               | Preschool                        | 98    | 21.2 |
|                                                                                                               | Middle school                    | 33    | 7.2  |
|                                                                                                               | High school                      | 15    | 3.3  |
| Where                                                                                                         | Others                           | 51    | 11.1 |
|                                                                                                               | Home                             | 235   | 51.0 |
|                                                                                                               | School                           | 122   | 26.5 |
|                                                                                                               | Kindergarten                     | 37    | 8.0  |
|                                                                                                               | Restaurant                       | 28    | 6.1  |
| By Whom (Foreced authority)                                                                                   | Relatives' house                 | 17    | 3.7  |
|                                                                                                               | Military base                    | 11    | 2.3  |
|                                                                                                               | Others                           | 11    | 2.4  |
|                                                                                                               | Parent                           | 231   | 50.1 |
|                                                                                                               | School teacher                   | 120   | 26.0 |
| The possibility to eat the target foods of forced eating                                                      | Nutrition teacher                | 17    | 3.7  |
|                                                                                                               | Relative                         | 23    | 5.0  |
|                                                                                                               | Nursing teacher                  | 20    | 4.3  |
|                                                                                                               | Sibling                          | 4     | 0.9  |
|                                                                                                               | Others                           | 46    | 10.0 |
| The extent to agree with the negative impacts of childhood experience of forced eating on current food habits | Never                            | 121   | 26.2 |
|                                                                                                               | Rarely                           | 68    | 14.8 |
|                                                                                                               | Sometimes                        | 75    | 16.3 |
|                                                                                                               | Often                            | 142   | 30.8 |
|                                                                                                               | Always                           | 55    | 11.9 |
| Total                                                                                                         | Strongly disagree                | 44    | 9.5  |
|                                                                                                               | Disagree                         | 113   | 24.5 |
|                                                                                                               | Neutral                          | 100   | 21.7 |
|                                                                                                               | Agree                            | 143   | 31.0 |
|                                                                                                               | Strongly agree                   | 61    | 13.2 |
| Total                                                                                                         | 461                              | 100.0 |      |

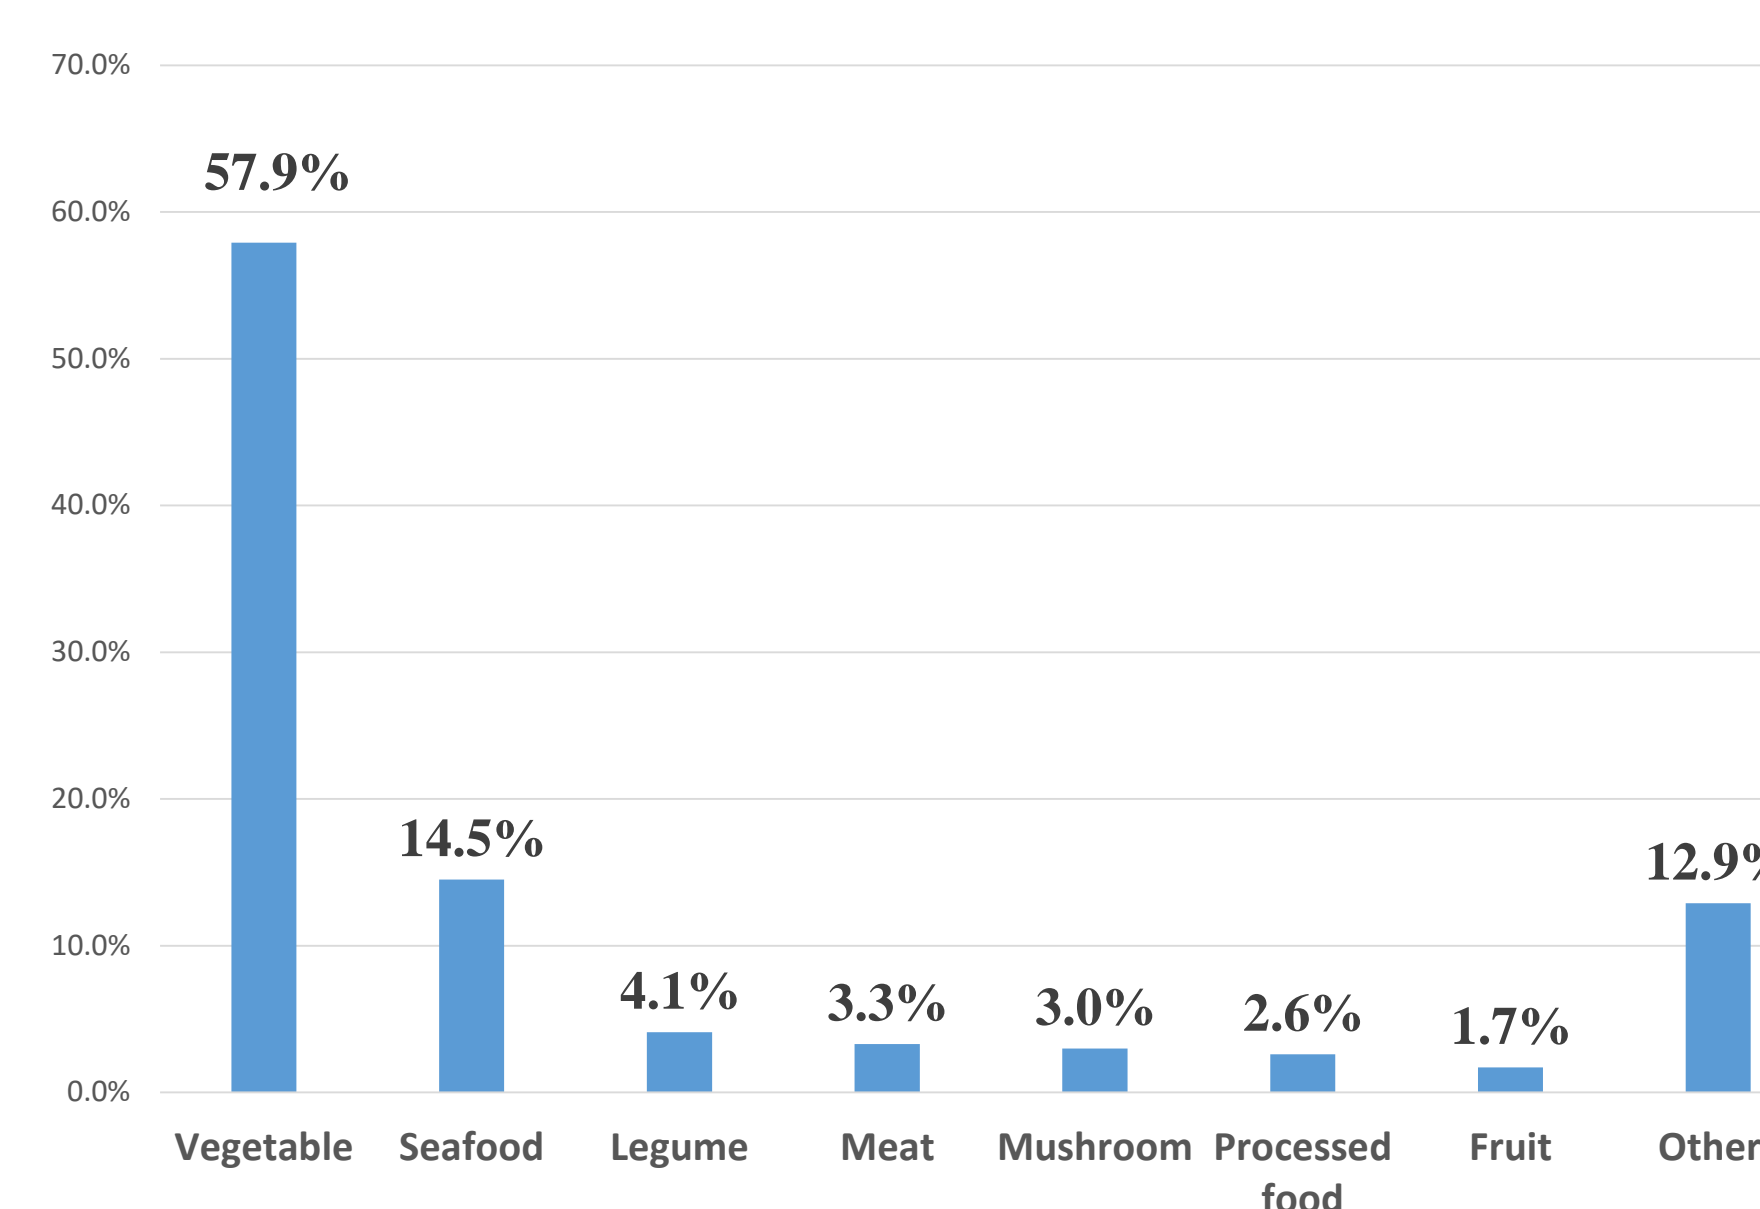

Figure 1. Target foods of forced eating

Table 3. Effects of childhood experiences of forced eating on vegetable consumption (n=461)

| Classification                                                                      | Childhood experiences of forced eating |            | t      | P <sup>1)</sup> |
|-------------------------------------------------------------------------------------|----------------------------------------|------------|--------|-----------------|
|                                                                                     | Yes                                    | No         |        |                 |
|                                                                                     | Mean (SD)                              |            |        |                 |
| Perceived daily intake of vegetable <sup>2)</sup><br>(I eat enough vegetable a day) | 2.52(0.88)                             | 2.79(0.93) | -5.102 | 0.000           |
| Vegetable acceptance <sup>2)</sup><br>(I can eat vegetable.)                        | 4.26(0.87)                             | 4.45(0.72) | -4.241 | 0.000           |
| Vegetable preference <sup>2)</sup><br>(I like vegetable.)                           | 3.72(0.98)                             | 4.03(0.85) | -5.899 | 0.000           |

<sup>1)</sup> P-value from t-test

<sup>2)</sup> Measured by 5-point Likert scales
